# Supplementary material
Source: PubMed Central journal article supplement (PMC7924656)
Supplement: rccm.201906-1250OC_harper_data_supplement.pdf [file rccm.201906-1250OC_harper_data_supplement.pdf]

## Income and Other Contributors to Poor Outcomes in US Sarcoidosis Patients

Logan J Harper MD, Alicia K Gerke MD, MBA, Xiao-Feng Wang PhD, Manuel L Ribeiro Neto MD,

Robert P Baughman MD, Kelli Beyer, Marjolein Drent MD PhD, Marc A Judson MD,

Lisa A Maier MD, MSPH, Leslie Serchuck MD, Noopur Singh, and Daniel A Culver DO

ONLINE DATA SUPPLEMENT

## Online Data Supplement

### METHODS

#### Predictors

We sought to determine the effect of household income on health-related quality of life, health outcomes and social outcomes for patients with sarcoidosis who participated in the FSR-SARC questionnaire. Household income was reported as a multiple-choice response with 18 levels, ranging from 0 to >\$250,000. We collapsed the responses to 3 equal tertiles: <\$35,000, \$35,000-\$85,000 and >\$185,000 to create 3 similar sized cohorts. A yearly income of \$35,000 was roughly equivalent to the Medicaid income cut off for a family of 4 in 2015 (\$33,465), the midpoint of our study period. Complete income data were available for 2057 of the included 2318 US respondents.

*A priori* we identified several potential confounding variables including markers of sarcoidosis extent and markers of social status. Social/demographic factors were based on self-report. Continuous variables included age at time of survey and household size. Categorical variables included gender, race, insurance status, education, organ involvement, medication history and comorbidity development. Following initial review, we divided comorbidity development into “steroid associated comorbidities” and “sarcoidosis associated comorbidities”.

Patients were asked to self-identify for their race with the options “American Indian or Alaska Native”, “Asian Indian”, “Black or African American”, “Chamorro”, “Chinese”, “Filipino”, “Guamanian”, “Japanese”, “Korean”, “Native Hawaiian”, “Other”, “Other Asian”, “Other Pacific Islander”, “White”, “Vietnamese”, “Samoan”, “Ashkenazi Jewish”, “Central American”, “Cuban”, “Dominican (Republic)”, “Hispanic or Latino”, “Mexican”, “Non-Hispanic or Latino”, “Other Hispanic/Latino/Spanish”, “Other Latin American”, “Puerto Rican”, “South American”. Patients were collapsed into “white” (if only selected “white”), “black” (if selected “Black or African American” regardless of if they selected other

racess) and “other” (if they selected any race besides “Black or African American”). This was done due to past studies demonstrating worse outcomes in black sarcoidosis patients.

For insurance status, available responses were “private health insurance”, “single service plan (e.g. dental, vision, prescription)”, “Medicare”, “Medigap”, “Medicaid”, “military health care”, “Indian health service”, “state sponsored health plan”, “other government program”, “No coverage” and “unsure”. We collapsed responses collapsed into “private”, “government” and “uninsured” due to sample size constraints and small numbers of responses in multiple categories.

Patient education included the responses “Never went to school”, “eighth grade or less”, “more than eighth grade but did not complete high school”, “completed a GED”, “high school graduate”, “went to a business, trade, or vocational school instead of high school”, “Went to college, but did not graduate”, “went to a business, trade, or vocational school after high school”, “graduated from a college or university”, “professional training beyond a four-year college or university”. These responses were collapsed down to “high school or less”, “more than high-school without college degree”, “completed college degree”, “more than college degree” due to sample size constraints.

Organ involvement was based on survey response data. Pulmonary involvement was defined as “have you ever been diagnosed with pulmonary (lung) involvement”. Skin involvement was defined as “sarcoidosis of the skin”, “abnormal skin pigmentation”, “lupus pernio”, “nodules under the skin”, “papules”, “plaques”, “other skin lesions diagnosed as caused by sarcoidosis”. Ocular involvement was defined as “sarcoidosis of the eye”, “anterior uveitis”, “posterior uveitis”, “nodules”, “keratoconjunctivitis”, “optic neuritis”, “vasculitis of the retina”. Cardiac involvement was defined as any of the following conditions “that a cardiologist diagnosed as related to the patient’s sarcoidosis”: “atrial arrhythmia”, “ventricular arrhythmia”, “cardiac sarcoidosis”, “cardiomyopathy”, “congestive heart failure”, “heart block”, “heart valve abnormality”, “pericarditis”, “syncope”. Neurologic

involvement was defined as “have you ever been diagnosed with neurosarcoidosis by a medical provider” and included “brain or lining of the brain”, “peripheral neuropathy” or “spinal cord involvement”. Patients with only small fiber neuropathy were not included in neurologic involvement for this study due to the subjectivity of this diagnosis.

Medication use was collected from survey response. Medications included in the survey were prednisone, methylprednisolone, hydroxychloroquine, chloroquine, methotrexate, azathioprine, leflunomide, mycophenolate, infliximab, adalimumab, certolizumab, golimumab, etanercept, rituximab, cyclophosphamide, pentoxifylline, IVIG, thalidomide, and corticotropin. Patients were asked if they were currently taking these medications or had taken them in the past. These responses were collapsed into “currently on medication”, “medication in past” and “never on medication”.

We included development of any new comorbidity following diagnosis of sarcoidosis in our model. Comorbidities were self-reported and included “cancer other than basal cell or squamous cell skin cancer”, “cataracts”, “chronic fatigue syndrome”, “chronic pain syndrome”, “congestive heart failure”, “diabetes”, “depression”, “fibromyalgia”, “glaucoma”, “hypertension”, “lymphoma”, “obesity”, “osteoporosis/osteopenia”, and “sleep apnea”. These comorbidities were separated into sarcoidosis associated comorbidities and steroid associated comorbidities, as described in the manuscript.

## **Outcomes**

We investigated the association of predictors across a range of patient reported outcomes. Health related quality of life was assessed with the Sarcoidosis Health Questionnaire(14), a validated 29 item survey designed to assess the impact of sarcoidosis on patients daily lives.

Health outcomes included ever hospitalized, use of supplemental oxygen, need for mobility assist device (assessed by patient response on the FSR-SARC questionnaire). “Ever hospitalized” was assessed by the question “Have you ever been admitted to the hospital for your sarcoidosis (Not for diagnostic

procedures)?". Patient responses were dichotomous ("yes" or "no"). Patients were asked if they used any oxygen devices including "ventilator", "BiPAP with sip ventilation", "oxygen", "CPAP", "BiPAP" and "inhalers". This was dichotomized into "oxygen", including "ventilator, "BiPAP with sip ventilation" and "oxygen" vs. "no oxygen" which included "CPAP", "BiPAP", "inhalers" and "none". We did this to separate patients who required respiratory support from patients who had no needs or likely OSA. Patients were asked if they used mobility assist devices including "cane", "walker", "wheelchair" or "none". We dichotomized this question into "use mobility device" which included those who selected "wheelchair" or "walker" vs. "no mobility device" which included "cane" and "none". We did this to split the respondents into a group who had significant mobility difficulties vs a group with minimal mobility challenges.

Social outcomes were "effect on family finances" and "need to quit job" (assessed by patient response on the FSR-SARC questionnaire). For "effect on family finances", we dichotomized the 4 responses into two groups: little effect which included "no financial impact" and "slightly affected" and severe effect which included "greatly affected" and "severely affected". We did this to simplify the model as there was no clear distinction between "greatly" and "severely" affected, and we saw little potential difference between "No financial impact" and "slightly affected". "Need to quit job" was assessed by the survey question "have you needed to quit your job due to health effects from sarcoidosis?". Potential responses were "yes", "no", "not applicable, do not work" and "unsure".

## **Models**

*Health Outcomes – Predictors of development of new sarcoidosis associated comorbidities.*

Our outcome was categorical and dichotomous: "presence of any sarcoidosis associated comorbidity" vs. "absence of any sarcoidosis comorbidity". We investigated association with our predictors using multivariate logistic regression analysis utilizing lasso for variable selection. Our predictors were income

(ordinal, 3 levels), patient age at time of survey (continuous), gender (categorical, 2 levels), race (categorical, 3 levels), insurance type (categorical, 3 levels), household size (continuous), education (ordinal, 4 levels), pulmonary involvement (dichotomous), neurologic involvement (dichotomous), cardiac involvement (dichotomous), ocular involvement (dichotomous), skin involvement (dichotomous), duration of symptoms (continuous) and medication history (categorical, 3 levels). Final model is reported (Table E4). Variables in the final model were then analyzed via random forest to determine relative importance.

#### *Health Outcomes – Development of Steroid Associated Comorbidity*

Our outcome was categorical and dichotomous: “presence of any steroid associated comorbidity” vs. “absence of any steroid comorbidity”. We investigated association with our predictors using multivariate logistic regression analysis utilizing lasso for variable selection. Our predictors were income (ordinal, 3 levels), patient age at time of survey (continuous), gender (categorical, 2 levels), race (categorical, 3 levels), insurance type (categorical, 3 levels), household size (continuous), education (ordinal, 4 levels), pulmonary involvement (dichotomous), neurologic involvement (dichotomous), cardiac involvement (dichotomous), ocular involvement (dichotomous), skin involvement (dichotomous), duration of symptoms (continuous) and medication history (categorical, 3 levels). Final model is reported in Table E5. Variables in the final model were then analyzed via random forest to determine relative importance.

#### *Health Outcomes – Prevalence of Patients Who Have Ever Been Hospitalized for Sarcoidosis*

Our outcome was dichotomous: “patient had ever been hospitalized for sarcoidosis” vs. “patient had never been hospitalized for sarcoidosis”. We investigated association with our predictors using multivariate logistic regression analysis utilizing lasso for variable selection. Our predictors were income (ordinal, 3 levels), patient age at time of survey (continuous), gender (categorical, 2 levels), race

(categorical, 3 levels), insurance type (categorical, 3 levels), household size (continuous), education (ordinal, 4 levels), pulmonary involvement (dichotomous), neurologic involvement (dichotomous), cardiac involvement (dichotomous), ocular involvement (dichotomous), skin involvement (dichotomous), duration of symptoms (continuous), medication history (categorical, 3 levels), presence of any sarcoidosis associated comorbidities (dichotomous), and presence of any steroid associated comorbidities (dichotomous). Final model is reported in Table E6. Variables in the final model were then analyzed via random forest to determine relative importance.

### *Quality of Life - SHQ*

Our outcome was patient score on the 29 point SHQ (continuous). We investigated association with our predictors using multivariate linear regression analysis utilizing lasso for variable selection. Our predictors were income (ordinal, 3 levels), patient age at time of survey (continuous), gender (categorical, 2 levels), race (categorical, 3 levels), insurance type (categorical, 3 levels), household size (continuous), education (ordinal, 4 levels), pulmonary involvement (dichotomous), neurologic involvement (dichotomous), cardiac involvement (dichotomous), ocular involvement (dichotomous), skin involvement (dichotomous), duration of symptoms (continuous), medication history (categorical, 3 levels), presence of any sarcoidosis associated comorbidities (dichotomous), and presence of any steroid associated comorbidities (dichotomous). Final model is reported in Table E7. Variables in the final model were then analyzed via random forest to determine relative importance.

### *Social Outcome - Effect on Family Finances*

Our outcome was reported financial impact on patient finances (ordinal, 3 levels). We investigated association with our predictors using multivariate logistic regression analysis utilizing lasso for variable selection. Our predictors were income (ordinal, 3 levels), patient age at time of survey (continuous), gender (categorical, 2 levels), race (categorical, 3 levels), insurance type (categorical, 3 levels),

household size (continuous), education (ordinal, 4 levels), pulmonary involvement (dichotomous), neurologic involvement (dichotomous), cardiac involvement (dichotomous), ocular involvement (dichotomous), skin involvement (dichotomous), duration of symptoms (continuous), medication history (categorical, 3 levels), presence of any sarcoidosis associated comorbidities (dichotomous), and presence of any steroid associated comorbidities (dichotomous). The final model is reported in table E8. Variables in the final model were then analyzed via random forest to determine relative importance.

#### *Other Outcomes – Oxygen Use*

Our outcome was use of supplemental oxygen (dichotomous). We investigated association with our predictors using multivariate logistic regression analysis utilizing lasso for variable selection. Our predictors were income (ordinal, 3 levels), patient age at time of survey (continuous), gender (categorical, 2 levels), race (categorical, 3 levels), insurance type (categorical, 3 levels), household size (continuous), education (ordinal, 4 levels), pulmonary involvement (dichotomous), neurologic involvement (dichotomous), cardiac involvement (dichotomous), ocular involvement (dichotomous), skin involvement (dichotomous), duration of symptoms (continuous), medication history (categorical, 3 levels), presence of any sarcoidosis associated comorbidities (dichotomous), and presence of any steroid associated comorbidities (dichotomous). The final model is reported in Table E9. Variables in the final model were then analyzed via random forest to determine relative importance.

#### *Other Outcomes – Mobility Device Use*

Our outcome was use of mobility device (dichotomous). We investigated association with our predictors using multivariate logistic regression analysis utilizing lasso for variable selection. Our predictors were income (ordinal, 3 levels), patient age at time of survey (continuous), gender (categorical, 2 levels), race (categorical, 3 levels), insurance type (categorical, 3 levels), household size (continuous), education (ordinal, 4 levels), pulmonary involvement (dichotomous), neurologic



involvement (dichotomous), cardiac involvement (dichotomous), ocular involvement (dichotomous), skin involvement (dichotomous), duration of symptoms (continuous), medication history (categorical, 3 levels), presence of any sarcoidosis associated comorbidities (dichotomous), and presence of any steroid associated comorbidities (dichotomous). The final model is reported in table E10. Variables in the final model were then analyzed via random forest to determine relative importance.

#### *Other Outcomes – Joblessness*

Our outcome was “have not lost job due to sarcoidosis”, “lost job due to sarcoidosis”, “never worked”, (categorical, 3 levels). We investigated association with our predictors using multivariate logistic regression analysis utilizing lasso for variable selection. Our predictors were income (ordinal, 3 levels), patient age at time of survey (continuous), gender (categorical, 2 levels), race (categorical, 3 levels), insurance type (categorical, 3 levels), household size (continuous), education (ordinal, 4 levels), pulmonary involvement (dichotomous), neurologic involvement (dichotomous), cardiac involvement (dichotomous), ocular involvement (dichotomous), skin involvement (dichotomous), duration of symptoms (continuous), medication history (categorical, 3 levels), presence of any sarcoidosis associated comorbidities (dichotomous), and presence of any steroid associated comorbidities (dichotomous). The final model is reported in table E11. Variables in the final model were then analyzed via random forest to determine relative importance.

#### **Institutional Review Board**

The SARC survey was approved by Advarra institutional review board number CR00126348.

## RESULTS

### *Supplemental Oxygen*

In univariate analysis, lower income was strongly associated with use of supplemental oxygen (Table E1). In multivariate analysis, income remained a significant predictor of supplemental oxygen use [ $< \$35,000$  OR 1.7 (1.04-2.6),  $\$35,000-\$85,000$  OR 1.5 (1.04-2.3)] (Table E1). Random Forest analysis suggested that income was the second major driver of oxygen use, following duration of symptoms (Figure E2).

### *Mobility Device*

In univariate analysis, lower income was also strongly predictive of use of a mobility device (Table E4). In multivariate analysis lower income remained predictive of mobility device use [ $< \$35,000$  OR 3.3 (2.0-5.4),  $\$35,000-\$85,000$  OR 1.8 (1.2-2.8)] (Table E2). In random forest analysis higher age and neurologic involvement, predictably, were the two major determinants of mobility device use. Of the other drivers, income was the most important (Figure E3).

### *Need to Quit Job*

“Need to quit job due to sarcoidosis” and “Not applicable – did not work” were analyzed together as nominal variables. “Need to quit a job related to sarcoidosis” (Table E3a) and “Did not work” (Table E3b) were associated with lower income in univariate analysis. In multivariate analysis, lower income remained significantly associated with losing a job due to sarcoidosis [ $< \$35,000$  OR 4.7 (3.1-7.2),  $\$35,000-\$85,000$  OR 1.7 (1.2-2.3)] (Table E3a) or not having worked prior to sarcoidosis diagnosis [ $< \$35,000$  OR 4.6 (2.7-8.0),  $\$35,000-\$85,000$  OR 1.4 (0.9-2.2)] (Table E3b). In random forest analysis, income was a leading predictor of having to quit a job due to sarcoidosis or not working prior to diagnosis, along with older age and longer duration of symptoms (Figure E4).

### *Missing Data*

Analysis of the missing participants demonstrates a similar composition to our study population based on our predictor variables except for age, medication use, pulmonary involvement and education (online data supplement Table E4a and Table E4b). Regarding outcomes, there was a difference in SHQ, financial impact, lose job for respondents who did not provide their income but no difference in hospitalization, oxygen use or mobility device use (online data supplement Table E5).

## **DISCUSSION**

The self-reported nature of our data resulted in a data set with moderate amounts of missing data. While this has the potential to introduce selection bias, we observed minimal difference in rates of our prediction variables between patients with and without income data (online data supplement Table E12a and Table E12b). We did note difference between those with and without income data in some of our outcomes (New sarcoidosis comorbidity, SHQ, job loss and effect on family finance) (online data supplement Table E13). However, the consistency of our results across all outcomes argues against systematic differences between those with and without missing data.

## Legends

Table E1: Predictors of use of supplemental oxygen

Data are expressed as absolute number with percentages, or mean with SD if appropriate.

Variables which were significant ( $p < 0.05$ ) in multivariate analysis are bolded.

Table E2: Predictors of using wheelchair or walker.

Data are expressed as absolute number with percentages, or mean with SD if appropriate.

Variables which were significant ( $p < 0.05$ ) in multivariate analysis are bolded.

Table E3a: Predictors of never working

Data are expressed as absolute number with percentages, or mean with SD if appropriate.

“Never Worked” and “Lost Job” were analyzed together as 3 separate categorical outcomes.

Variables which were significant ( $p < 0.05$ ) in multivariate analysis are bolded.

Table E3b: Predictors of having lost job due to sarcoidosis

Data are expressed as absolute number with percentages, or mean with SD if appropriate.

“Never Worked” and “Lost Job” were analyzed together as 3 separate categorical outcomes.

Variables which were significant ( $p < 0.05$ ) in multivariate analysis are bolded.

Table E4: Full Model – Multivariate Logistic Regression for Developing New Sarcoidosis Associated Comorbidity (Dichotomous)

Table E5: Final Model - Multivariate Logistic Regression for Developing Steroid Associated Comorbidities (Dichotomous)

Table E6: Final Model - Multivariate Logistic Regression for Ever Being Hospitalized for Sarcoidosis  
(Dichotomous)

Table E7: Supplemental Table E7 - Full Model - Multivariate Linear Regression for Sarcoidosis Health  
Questionnaire (Continuous)

Table E8: Final Model - Multivariate Logistic Regression for Effect on Family Finances (Dichotomous)

Table E9: Final Model - Multivariate Logistic Regression for Use of Supplemental Oxygen (Dichotomous)

Table E10: Final Model - Multivariate Logistic Regression for Use of Mobility Device (Dichotomous)

Table E11: Final Model - Multivariate Logistic Regression for Quit Job vs. Never Worked vs. Still Working  
(Categorical)

Supplemental Table E12a – Differences in covariates based on missing income data

Supplemental Table E12b – Differences in covariates based on missing income data

Supplemental Table 13 – Difference in outcome based on missing income data

Figure E1: Comorbidity Frequency

Rate of each measured comorbidity in our cohort.

Figure E2: Random Forest Model –Supplemental Oxygen Use

Random Forest plots of analysis of variables included in multivariate model selected by LASSO for prediction of patient using supplemental oxygen. Higher values of “Mean Decrease Gini” reflect increasing proportional importance of the individual variables to predicting this categorical outcome.

Figure E3: Random Forest Model –Walker or Wheelchair Use

Random Forest plots of analysis of variables included in multivariate model selected by LASSO for prediction of patient using a walker or wheelchair. Higher values of “Mean Decrease Gini” reflect increasing proportional importance of the individual variables to predicting this categorical outcome.

Figure E4: Random Forest Model –Lose Job or Never Worked

Random Forest plots of analysis of variables included in multivariate model selected by LASSO for prediction of patient never having worked or losing their job after diagnosis of sarcoidosis. Higher values of “Mean Decrease Gini” reflect increasing proportional importance of the individual variables to predicting this categorical outcome.

SUPPLEMENTAL TABLES

Table E1: Supplemental Oxygen Use

|                                | Univariate<br>OR | Multivariate - Lasso<br>n= 1091<br>OR |
|--------------------------------|------------------|---------------------------------------|
| <b>Income</b>                  |                  |                                       |
| >\$85,000                      | Ref              | Ref                                   |
| \$35,000-\$85,000              | 1.8 (1.3-2.3)    | 1.5 (1.04-2.3)                        |
| <\$35,000                      | 2.5 (1.8-3.3)    | 1.7 (1.04-2.6)                        |
| Age                            | 1.03 (1.02-1.04) |                                       |
| Male                           | 0.9 (0.7-1.1)    |                                       |
| Race                           |                  |                                       |
| White                          | Ref              |                                       |
| African American               | 1.7 (1.3-2.2)    | 1.4 (0.97-2.1)                        |
| Other                          | 0.9 (0.6-1.3)    | 0.8 (0.4-1.4)                         |
| <b>Insurance Type</b>          |                  |                                       |
| Private                        | Ref              |                                       |
| Government                     | 2.1 (1.7-2.5)    | 1.5 (1.1-2.2)                         |
| No coverage                    | 1.4 (0.8-2.4)    | 0.7 (0.2-1.9)                         |
| Household Size                 | 0.9 (0.8-0.97)   |                                       |
| Patient Education              |                  |                                       |
| >College                       | Ref              |                                       |
| College                        | 1.5 (1.1-2.1)    |                                       |
| Post HS education              | 1.6 (1.2-2.3)    |                                       |
| HS                             | 2.0 (1.4-2.9)    |                                       |
| <b>Pulmonary Involvement</b>   | 3.4 (2.3-4.9)    | 2.7 (1.5-4.7)                         |
| <b>Neurologic Involvement</b>  | 1.8 (1.4-2.4)    | 1.7 (1.2-2.5)                         |
| <b>Cardiac Involvement</b>     | 2.2 (1.7-2.8)    | 2.1 (1.5-2.9)                         |
| Ocular Involvement             | 1.7 (1.4-2.1)    |                                       |
| Skin Involvement               | 1.6 (1.3-2.1)    |                                       |
| <b>Duration of Symptoms</b>    | 1.03 (1.03-1.04) | 1.01 (1.0-1.03)                       |
| Medication History             |                  |                                       |
| Never                          | Ref              |                                       |
| Past                           | 2.7 (1.7-4.2)    |                                       |
| Current                        | 3.4 (2.3-5.3)    |                                       |
| New Sarcoidosis Comorbidity    | 2.6 (2.1-3.3)    | 1.4 (0.966-2.0)                       |
| <b>New Steroid Comorbidity</b> | 2.7 (2.1-3.3)    | 1.7 (1.2-2.4)                         |

Table E2: Use of Mobility Device (Wheelchair/Walker)

|                                    | Univariate<br>OR  | Multivariate – Lasso<br>n= 1307<br>OR |
|------------------------------------|-------------------|---------------------------------------|
| <b>Income</b>                      |                   |                                       |
| >\$85,000                          | Ref               | Ref                                   |
| \$35,000-\$85,000                  | 2.4 (1.7-3.4)     | 1.8 (1.2-2.8)                         |
| <\$35,000                          | 5.5 (3.9-7.7)     | 3.3 (2.0-5.4)                         |
| <b>Age</b>                         | 1.01 (1.004-1.03) | 1.02 (1.01-1.04)                      |
| Male                               | 0.8 (0.6-1.001)   |                                       |
| <b>Race</b>                        |                   |                                       |
| White                              | Ref               |                                       |
| AA                                 | 1.7 (1.3-2.2)     |                                       |
| Other                              | 1.9 (1.3-2.7)     |                                       |
| <b>Insurance Type</b>              |                   |                                       |
| Private                            | Ref               | Ref                                   |
| Government                         | 3.2 (2.6-4.1)     | 1.8 (1.2-2.6)                         |
| No coverage                        | 1.6 (0.8-2.9)     | 0.7 (0.3-2.0)                         |
| Household Size                     | 0.9 (0.9-1.0)     |                                       |
| <b>Patient Education</b>           |                   |                                       |
| >College                           | Ref               |                                       |
| College                            | 1.8 (1.3-2.5)     |                                       |
| Post HS education                  | 1.5 (1.1-2.1)     |                                       |
| HS                                 | 1.7 (1.1-2.5)     |                                       |
| Pulmonary Involvement              | 0.8 (0.6-1.1)     |                                       |
| <b>Neurologic Involvement</b>      | 6.2 (4.8-8.1)     | 4.7 (3.4-6.7)                         |
| Cardiac Involvement                | 1.4 (1.1-1.8)     |                                       |
| Ocular Involvement                 | 2.3 (1.8-2.9)     | 1.3 (0.9-1.8)                         |
| Skin Involvement                   | 1.6 (1.2-2.1)     |                                       |
| Duration of Symptoms               | 1.02 (1.01-1.03)  |                                       |
| <b>Medication History</b>          |                   |                                       |
| Never                              | Ref               |                                       |
| Past                               | 1.9 (1.2-3.1)     |                                       |
| Current                            | 3.1 (2.0-4.9)     |                                       |
| <b>New Sarcoidosis Comorbidity</b> | 4.1 (3.1-5.4)     | 2.4 (1.7-3.5)                         |
| <b>New Steroid Comorbidity</b>     | 2.8 (2.2-3.6)     |                                       |



Table E3a: Need to Quit Job due to Sarcoidosis

|                                    | Univariate<br>OR | Multivariate – Lasso<br>n=1317<br>OR |
|------------------------------------|------------------|--------------------------------------|
| <b>Income</b>                      |                  |                                      |
| >\$85,000                          | Ref              | Ref                                  |
| \$35,000-\$85,000                  | 2.2 (1.7-2.8)    | 1.7 (1.2-2.3)                        |
| <\$35,000                          | 8.3 (6.2-10.9)   | 4.7 (3.1-7.2)                        |
| <b>Age</b>                         | 1.0 (0.99-1.01)  | 1.0 (0.98-1.01)                      |
| Male                               | 0.6 (0.5-0.8)    |                                      |
| <b>Race</b>                        |                  |                                      |
| White                              | Ref              |                                      |
| African American                   | 1.9 (1.5-2.4)    |                                      |
| Other                              | 2.2 (1.6-3.1)    |                                      |
| <b>Insurance Coverage</b>          |                  |                                      |
| Private                            | Ref              | Ref                                  |
| Government                         | 4.4 (3.6-5.4)    | 2.3 (1.7-3.3)                        |
| No coverage                        | 2.5 (1.5-4.1)    | 0.9 (0.4-1.9)                        |
| Household Size                     | 1.0 (0.9-1.02)   | 1.0 (0.9-1.1)                        |
| <b>Patient Education</b>           |                  |                                      |
| >College                           | Ref              |                                      |
| College                            | 1.5 (1.1-2.0)    |                                      |
| Post HS education                  | 2.6 (2.0-3.5)    |                                      |
| HS                                 | 2.5 (1.8-3.5)    |                                      |
| Pulmonary Involvement              | 1.3 (0.995-1.7)  |                                      |
| <b>Neurologic Involvement</b>      | 4.3 (3.3-5.5)    | 3.8 (2.7-5.4)                        |
| Cardiac Involvement                | 1.7 (1.3-2.1)    |                                      |
| Ocular Involvement                 | 2.4 (1.9-2.9)    |                                      |
| Skin Involvement                   | 2.1 (1.7-2.6)    |                                      |
| Duration of Symptoms               | 1.03 (1.02-1.04) | 1.01 (1.0-1.3)                       |
| <b>Medication History</b>          |                  |                                      |
| Never                              | Ref              |                                      |
| Past                               | 5.3 (3.3-8.5)    |                                      |
| Current                            | 7.4 (4.7 -11.6)  |                                      |
| <b>New Sarcoidosis Comorbidity</b> | 4.9 (3.9-6.1)    | 2.8 (2.1-3.9)                        |
| <b>New Steroid Comorbidity</b>     | 3.1 (2.5-3.8)    | 1.5 (1.1-2.1)                        |

Table E3b: Did Not Work Prior to Sarcoidosis Diagnosis

|                                    | Univariate<br>OR | Multivariate - Lasso<br>OR |
|------------------------------------|------------------|----------------------------|
| <b>Income</b>                      |                  |                            |
| >\$85,000                          | Ref              | Ref                        |
| \$35,000-\$85,000                  | 1.7 (1.2-2.5)    | 1.4 (0.9-2.2)              |
| <\$35,000                          | 6.2 (4.2-9.2)    | 4.6 (2.7-8.0)              |
| <b>Age</b>                         | 1.04 (1.02-1.05) | 1.03 (1.01-1.06)           |
| Male                               | 0.5 (0.3-0.7)    |                            |
| <b>Race</b>                        |                  |                            |
| White                              | Ref              |                            |
| African American                   | 1.3 (0.9-1.9)    |                            |
| Other                              | 1.8 (1.1-2.8)    |                            |
| <b>Insurance Coverage</b>          |                  |                            |
| Private                            | Ref              | Ref                        |
| Government                         | 4.7 (3.5-6.2)    | 3.4 (2.2-5.2)              |
| No coverage                        | 1.7 (0.8-3.8)    | 0.4 (0.1-2.0)              |
| Household Size                     | 0.9 (0.8-0.99)   | 1.1 (0.9-1.3)              |
| <b>Patient Education</b>           |                  |                            |
| >College                           | Ref              |                            |
| College                            | 1.6 (1.04-2.6)   |                            |
| Post HS education                  | 3.5 (2.3-5.5)    |                            |
| HS                                 | 3.6 (2.2-5.8)    |                            |
| Pulmonary Involvement              | 0.8 (0.6-1.1)    |                            |
| <b>Neurologic Involvement</b>      | 1.2 (0.8-1.9)    | 1.3 (0.7-2.3)              |
| Cardiac Involvement                | 0.9 (0.6-1.3)    |                            |
| Ocular Involvement                 | 1.5 (1.2-2.1)    |                            |
| Skin Involvement                   | 1.2 (0.9-1.7)    |                            |
| Duration of Symptoms               | 1.0 (0.997-1.02) | 1.0 (0.98-1.02)            |
| <b>Medication History</b>          |                  |                            |
| Never                              | Ref              |                            |
| Past                               | 0.8 (0.6-1.3)    |                            |
| Current                            | 0.8 (0.5-1.1)    |                            |
| <b>New Sarcoidosis Comorbidity</b> | 1.3 (0.99-1.8)   | 0.9 (0.6-1.4)              |
| <b>New Steroid Comorbidity</b>     | 1.4 (1.02-1.8)   | 0.7 (0.5-1.1)              |

Supplemental Table E4

Full Model – Multivariate Logistic Regression for Developing New Sarcoidosis Associated Comorbidity (Dichotomous)

| Parameter                    | DF | Estimate | Standard Error | Wald Chi-Square | Pr > ChiSq |
|------------------------------|----|----------|----------------|-----------------|------------|
| Intercept                    | 1  | -1.4517  | 0.1544         | 88.3934         | <.0001     |
| Income                       |    |          |                |                 |            |
| \$0-\$34,999                 | 1  | 0.8624   | 0.1708         | 25.4891         | <.0001     |
| \$35,000-\$84,999            | 1  | 0.3486   | 0.1507         | 5.3497          | 0.0207     |
| >\$85,000                    |    |          |                |                 |            |
| Neurologic Involvement - Yes | 1  | 0.9651   | 0.1742         | 30.7122         | <.0001     |
| Cardiac Involvement - Yes    | 1  | 0.8077   | 0.1528         | 27.9389         | <.0001     |
| Skin Involvement - Yes       | 1  | 0.4734   | 0.137          | 11.9401         | 0.0005     |
| Duration of Symptoms         | 1  | 0.0387   | 0.00619        | 39.0598         | <.0001     |

Supplemental Table E5

Final Model - Multivariate Logistic Regression for Developing Steroid Associated Comorbidities (Dichotomous)

| Parameter                    | DF | Estimate | Standard Error | Wald Chi-Square | Pr > ChiSq |
|------------------------------|----|----------|----------------|-----------------|------------|
| Intercept                    | 1  | -4.36    | 0.5277         | 68.2701         | <.0001     |
| Age                          | 1  | 0.0362   | 0.00787        | 21.1432         | <.0001     |
| Income                       |    |          |                |                 |            |
| \$0-\$34,999                 | 1  | 0.2855   | 0.2197         | 1.6889          | 0.1937     |
| \$35,000-\$84,999            | 1  | 0.4138   | 0.1703         | 5.9083          | 0.0151     |
| >\$85,000                    |    |          |                |                 |            |
| Insurance                    |    |          |                |                 |            |
| Government                   | 1  | 0.4209   | 0.186          | 5.1228          | 0.0236     |
| None                         | 1  | -0.2061  | 0.4265         | 0.2335          | 0.629      |
| Private                      |    |          |                |                 |            |
| Race                         |    |          |                |                 |            |
| African American             | 1  | 0.7059   | 0.1986         | 12.6334         | 0.0004     |
| Other                        | 1  | 0.654    | 0.2813         | 5.4036          | 0.0201     |
| White                        |    |          |                |                 |            |
| Neurologic Involvement - Yes | 1  | 0.8622   | 0.1982         | 18.9277         | <.0001     |
| Ocular Involvement - Yes     | 1  | 0.4759   | 0.1617         | 8.6616          | 0.0032     |
| Lung Involvement - Yes       | 1  | 0.7533   | 0.2015         | 13.9776         | 0.0002     |
| Cardiac Involvement - Yes    | 1  | 0.3004   | 0.1726         | 3.0288          | 0.0818     |
| Medication History           |    |          |                |                 |            |
| Current                      | 1  | 0.947    | 0.2369         | 15.9772         | <.0001     |
| Past                         |    |          |                |                 |            |
| Never                        |    |          |                |                 |            |
| Male                         | 1  | -0.3833  | 0.1712         | 5.0121          | 0.0252     |
| Duration of Symptoms         | 1  | 0.0379   | 0.00771        | 24.1639         | <.0001     |

Supplemental Table E6

Final Model - Multivariate Logistic Regression for Ever Being Hospitalized for Sarcoidosis  
(Dichotomous)

| Parameter                       | DF | Estimate | Standard Error | Wald Chi-Square | Pr > ChiSq |
|---------------------------------|----|----------|----------------|-----------------|------------|
| Intercept                       | 1  | -1.4128  | 0.0973         | 211.0159        | <.0001     |
| Neurologic Involvement - Yes    | 1  | 0.8601   | 0.1495         | 33.0885         | <.0001     |
| Cardiac Involvement - Yes       | 1  | 1.1462   | 0.1343         | 72.845          | <.0001     |
| Develop Sarcoidosis Comorbidity | 1  | 0.77     | 0.1217         | 40.0561         | <.0001     |

Supplemental Table E7 - Full Model - Multivariate Linear Regression for Sarcoidosis Health Questionnaire (Continuous)

| Parameter                       | Estimate | Standard Error | t Value | Pr >  t |
|---------------------------------|----------|----------------|---------|---------|
| Intercept                       | 4.650213 | 0.211847       | 21.95   | <.0001  |
| Age                             | 0.018234 | 0.002986       | 6.11    | <.0001  |
| <i>Income</i>                   |          |                |         |         |
| \$0-\$34,999                    | -0.50758 | 0.084475       | -6.01   | <.0001  |
| \$35,000-\$84,999               | -0.25063 | 0.065851       | -3.81   | 0.0002  |
| >\$85,000                       | 0        | .              | .       | .       |
| <i>Insurance</i>                |          |                |         |         |
| Government                      | -0.15653 | 0.069728       | -2.24   | 0.025   |
| None                            | 0.012982 | 0.172312       | 0.08    | 0.94    |
| Private                         | 0        | .              | .       | .       |
| Household Size                  | -0.05855 | 0.020696       | -2.83   | 0.0048  |
| Neurologic Involvement          | -0.19454 | 0.071927       | -2.7    | 0.007   |
| No                              | 0        | .              | .       | .       |
| Cardiac Involvement             | -0.11723 | 0.065268       | -1.8    | 0.0728  |
| No                              | 0        | .              | .       | .       |
| Lung Involvement                | -0.34891 | 0.076643       | -4.55   | <.0001  |
| No                              | 0        | .              | .       | .       |
| Ocular Involvement              | -0.08788 | 0.061984       | -1.42   | 0.1566  |
| No                              | 0        | .              | .       | .       |
| Skin Involvement                | -0.44755 | 0.060503       | -7.4    | <.0001  |
| No                              | 0        | .              | .       | .       |
| Medication History              |          |                |         |         |
| Current                         | -0.57511 | 0.091123       | -6.31   | <.0001  |
| Past                            | -0.41361 | 0.098029       | -4.22   | <.0001  |
| Never                           | 0        | .              | .       | .       |
| Male                            | 0.324641 | 0.066778       | 4.86    | <.0001  |
| No                              | 0        | .              | .       | .       |
| Develop Steroid Comorbidity     | -0.1829  | 0.062015       | -2.95   | 0.0033  |
| No                              | 0        | .              | .       | .       |
| Develop Sarcoidosis Comorbidity | -0.61504 | 0.061225       | -10.05  | <.0001  |
| No                              | 0        | .              | .       | .       |

Supplemental Figure E8

Final Model - Multivariate Logistic Regression for Effect on Family Finances (Dichotomous)

| Parameter                       | DF | Estimate | Standard Error | Wald Chi-Square | Pr > ChiSq |
|---------------------------------|----|----------|----------------|-----------------|------------|
| Intercept                       | 1  | -1.4301  | 0.547          | 6.836           | 0.0089     |
| Age                             | 1  | -0.0367  | 0.00843        | 18.9272         | <.0001     |
| Income                          |    |          |                |                 |            |
| \$0-\$34,999                    | 1  | 2.0634   | 0.2441         | 71.475          | <.0001     |
| \$35,000-\$84,999               | 1  | 0.9879   | 0.1899         | 27.0682         | <.0001     |
| >\$85,000                       |    |          |                |                 |            |
| Insurance                       |    |          |                |                 |            |
| Government                      | 1  | -0.0448  | 0.1971         | 0.0516          | 0.8204     |
| None                            | 1  | 0.8253   | 0.5486         | 2.2634          | 0.1325     |
| Private                         |    |          |                |                 |            |
| Education                       |    |          |                |                 |            |
| High School or Less             | 1  | -0.1735  | 0.2646         | 0.4301          | 0.512      |
| >HS without College Degree      | 1  | 0.2113   | 0.2277         | 0.8612          | 0.3534     |
| College                         | 1  | -0.1456  | 0.2245         | 0.4209          | 0.5165     |
| > College                       |    |          |                |                 |            |
| Neurologic Involvement - Yes    | 1  | 0.8073   | 0.2045         | 15.5834         | <.0001     |
| Cardiac Involvement - Yes       | 1  | 0.498    | 0.1871         | 7.0831          | 0.0078     |
| Ocular Involvement - Yes        | 1  | 0.2136   | 0.1748         | 1.4927          | 0.2218     |
| Lung Involvement - Yes          | 1  | 0.5233   | 0.2214         | 5.5882          | 0.0181     |
| Medication History              |    |          |                |                 |            |
| Current                         | 1  | 1.0404   | 0.2827         | 13.542          | 0.0002     |
| Past                            | 1  | 0.8808   | 0.305          | 8.3383          | 0.0039     |
| Never                           |    |          |                |                 |            |
| Develop Steroid Comorbidity     | 1  | 0.3913   | 0.1735         | 5.0859          | 0.0241     |
| Develop Sarcoidosis Comorbidity | 1  | 0.804    | 0.168          | 22.9062         | <.0001     |
| Duration of Symptoms            | 1  | -0.00891 | 0.00793        | 1.2624          | 0.2612     |

Supplemental Table E9

## Final Model - Multivariate Logistic Regression for Use of Supplemental Oxygen (Dichotomous)

| Parameter                       | DF | Estimate | Standard Error | Wald Chi-Square | Pr > ChiSq |
|---------------------------------|----|----------|----------------|-----------------|------------|
| <i>Intercept</i>                | 1  | -3.6966  | 0.328          | 127.0225        | <.0001     |
| Income                          |    |          |                |                 |            |
| \$0-\$34,999                    | 1  | 0.5065   | 0.2378         | 4.537           | 0.0332     |
| \$35,000-\$84,999               | 1  | 0.4333   | 0.1999         | 4.6998          | 0.0302     |
| >\$85,000                       |    |          |                |                 |            |
| Insurance                       |    |          |                |                 |            |
| Government                      | 1  | 0.4186   | 0.1901         | 4.8493          | 0.0277     |
| None                            | 1  | -0.3812  | 0.5256         | 0.5261          | 0.4683     |
| Private                         |    |          |                |                 |            |
| Race                            |    |          |                |                 |            |
| African American                | 1  | 0.3516   | 0.1935         | 3.3017          | 0.0692     |
| Other                           | 1  | -0.2824  | 0.3227         | 0.7662          | 0.3814     |
| White                           |    |          |                |                 |            |
| Neurologic Involvement - Yes    | 1  | 0.5332   | 0.1896         | 7.9054          | 0.0049     |
| Lung Involvement - Yes          | 1  | 0.9747   | 0.2879         | 11.4629         | 0.0007     |
| Cardiac Involvement - Yes       | 1  | 0.7224   | 0.1715         | 17.7403         | <.0001     |
| Develop Steroid Comorbidity     | 1  | 0.5168   | 0.1854         | 7.7668          | 0.0053     |
| Develop Sarcoidosis Comorbidity | 1  | 0.3173   | 0.1797         | 3.1158          | 0.0775     |
| Duration of Symptoms            | 1  | 0.0132   | 0.00671        | 3.8851          | 0.0487     |



Supplemental Table E10

Final Model - Multivariate Logistic Regression for Use of Mobility Device (Dichotomous)

| Parameter                       | DF | Estimate | Standard Error | Wald Chi-Square | Pr > ChiSq |
|---------------------------------|----|----------|----------------|-----------------|------------|
| Intercept                       | 1  | -4.7322  | 0.514          | 84.7482         | <.0001     |
| Age                             | 1  | 0.0218   | 0.00833        | 6.8415          | 0.0089     |
| Income                          |    |          |                |                 |            |
| \$0-\$34,999                    | 1  | 1.1953   | 0.2482         | 23.1861         | <.0001     |
| \$35,000-\$84,999               | 1  | 0.6022   | 0.2254         | 7.1385          | 0.0075     |
| >\$85,000                       |    |          |                |                 |            |
| Insurance                       |    |          |                |                 |            |
| Government                      | 1  | 0.5773   | 0.1881         | 9.4243          | 0.0021     |
| None                            | 1  | -0.2582  | 0.4963         | 0.2706          | 0.6029     |
| Private                         |    |          |                |                 |            |
| Neurologic Involvement - Yes    | 1  | 1.5535   | 0.174          | 79.6752         | <.0001     |
| Ocular Involvement - Yes        | 1  | 0.2517   | 0.1698         | 2.1979          | 0.1382     |
| Develop Sarcoidosis Comorbidity | 1  | 0.8858   | 0.1874         | 22.3448         | <.0001     |

Supplemental Table E11

Final Model - Multivariate Logistic Regression for Quit Job vs. Never Worked vs. Still Working (Categorical)

| Parameter                       | Quit Job vs.<br>Never Worked | DF | Estimate | Standard<br>Error | Wald Chi-<br>Square | Pr > ChiSq |
|---------------------------------|------------------------------|----|----------|-------------------|---------------------|------------|
| Intercept                       | Quit Job                     | 1  | -2.4092  | 0.5043            | 22.819              | <.0001     |
| Intercept                       | Never Worked                 | 1  | -4.8579  | 0.7094            | 46.8917             | <.0001     |
| Age                             | Quit Job                     | 1  | -0.00486 | 0.00802           | 0.3675              | 0.5444     |
| Age                             | Never Worked                 | 1  | 0.0417   | 0.0108            | 14.9593             | 0.0001     |
| Income                          |                              |    |          |                   |                     |            |
| \$0-\$34,999                    | Quit Job                     | 1  | 1.558    | 0.2106            | 54.7408             | <.0001     |
| \$0-\$34,999                    | Never Worked                 | 1  | 1.5436   | 0.2728            | 32.0269             | <.0001     |
| \$35,000-\$84,999               | Quit Job                     | 1  | 0.5013   | 0.173             | 8.3982              | 0.0038     |
| \$35,000-\$84,999               | Never Worked                 | 1  | 0.3259   | 0.2441            | 1.782               | 0.1819     |
| >\$85,000                       |                              |    |          |                   |                     |            |
| Insurance                       |                              |    |          |                   |                     |            |
| Government                      | Quit Job                     | 1  | 0.8483   | 0.1731            | 24.0254             | <.0001     |
| Government                      | Never Worked                 | 1  | 1.2177   | 0.217             | 31.4898             | <.0001     |
| None                            | Quit Job                     | 1  | -0.088   | 0.3728            | 0.0558              | 0.8133     |
| None                            | Never Worked                 | 1  | -0.8288  | 0.771             | 1.1558              | 0.2823     |
| Private                         |                              |    |          |                   |                     |            |
| Household Size                  | Quit Job                     | 1  | -0.0254  | 0.0543            | 0.2191              | 0.6397     |
| Household Size                  | Never Worked                 | 1  | 0.0792   | 0.0748            | 1.1193              | 0.2901     |
| Neurologic Involvement - Yes    | Quit Job                     | 1  | 1.3449   | 0.1715            | 61.4931             | <.0001     |
| Neurologic Involvement - Yes    | Never Worked                 | 1  | 0.2587   | 0.2853            | 0.8222              | 0.3645     |
| Develop Steroid Comorbidity     | Quit Job                     | 1  | 0.4305   | 0.1587            | 7.3538              | 0.0067     |
| Develop Steroid Comorbidity     | Never Worked                 | 1  | -0.3036  | 0.2158            | 1.9779              | 0.1596     |
| Develop Sarcoidosis Comorbidity | Quit Job                     | 1  | 1.0468   | 0.1557            | 45.2033             | <.0001     |
| Develop Sarcoidosis Comorbidity | Never Worked                 | 1  | -0.056   | 0.2144            | 0.0683              | 0.7938     |
| Duration of Symptoms            | Quit Job                     | 1  | 0.0137   | 0.00678           | 4.1008              | 0.0429     |
| Duration of Symptoms            | Never Worked                 | 1  | 0.000849 | 0.00916           | 0.0086              | 0.9261     |

Supplemental Table E12a – Differences in covariates based on missing income data

|                              | Complete Income Data<br>n=2057 | Missing Income Data<br>n=261 | p      |
|------------------------------|--------------------------------|------------------------------|--------|
| <b>Age (mean (SD))</b>       | 51.8 (10.8)                    | 55.0 (10.9)                  | <0.001 |
| Gender = Male (%)            | 531 (25.8)                     | 69 (26.4)                    | 0.9    |
| Race (%)                     |                                |                              | 0.7    |
| African American             | 370 (18%)                      | 48 (19%)                     |        |
| Other                        | 167 (8%)                       | 24 (19%)                     |        |
| White                        | 1506 (74%)                     | 183 (72%)                    |        |
| Duration (mean (SD))         | 11.63 (11.7)                   | 11.92 (13.0)                 | 0.7    |
| <b>Medication Use (%)</b>    |                                |                              | 0.009  |
| Current                      | 1191 (59%)                     | 121 (49%)                    |        |
| None                         | 271 (14%)                      | 42 (17%)                     |        |
| Past                         | 550 (27%)                      | 84 (34%)                     |        |
| <b>Pulmonary Involvement</b> | 1604 (83%)                     | 190 (77%)                    | 0.03   |
| Skin Involvement             | 1217 (65%)                     | 140 (60%)                    | 0.2    |
| Ocular Involvement           | 667 (37%)                      | 89 (41%)                     | 0.3    |
| Cardiac Involvement          | 429 (26%)                      | 58 (29%)                     | 0.5    |
| Neurologic Involvement       | 343 (20%)                      | 38 (19%)                     | 0.8    |
| Insurance (%)                |                                |                              | 0.6    |
| Government                   | 606 (30%)                      | 69 (27%)                     |        |
| None                         | 70 (4%)                        | 8 (3%)                       |        |
| Private                      | 1348 (67%)                     | 173 (70%)                    |        |
| Patient Education            |                                |                              | 0.06   |
| >College                     | 398 (21%)                      | 59 (26%)                     |        |
| College                      | 613 (32%)                      | 58 (26%)                     |        |
| Post HS education            | 596 (31%)                      | 62 (28%)                     |        |
| HS                           | 323 (17%)                      | 46 (20%)                     |        |
| Household Size               | 2.7 (1.5)                      | 2.7 (1.7)                    | 0.5    |

Supplemental Table E12b – Differences in covariates based on missing income data

|                                  | Complete Income Data<br>n=2057 | Missing Income Data<br>n=261 | p           |
|----------------------------------|--------------------------------|------------------------------|-------------|
| Cancer = Yes (%)                 | 85 (5%)                        | 15 (7%)                      | 0.3         |
| Cataracts = Yes (%)              | 274 (15%)                      | 34 (15%)                     | 1.0         |
| <b>Chronic fatigue = Yes (%)</b> | <b>428 (23%)</b>               | <b>36 (16%)</b>              | <b>0.01</b> |
| Chronic pain = Yes (%)           | 359 (20%)                      | 39 (17%)                     | 0.4         |
| Heart Failure = Yes (%)          | 77 (4%)                        | 8 (4%)                       | 0.7         |
| Diabetes = Yes (%)               | 234 (13%)                      | 25 (11%)                     | 0.5         |
| Depression = Yes (%)             | 524 (29%)                      | 57 (25%)                     | 0.2         |
| <b>Fibromyalgia = Yes (%)</b>    | <b>253 (14%)</b>               | <b>18 (8%)</b>               | <b>0.02</b> |
| Glaucoma = Yes (%)               | 76 (4%)                        | 14 (6%)                      | 0.2         |
| Hypertension = Yes (%)           | 323 (18%)                      | 35 (15%)                     | 0.4         |
| Lymphoma = Yes (%)               | 25 (1%)                        | 2 (1%)                       | 0.7         |
| Obesity = Yes (%)                | 420 (23%)                      | 42 (18%)                     | 0.1         |
| Osteoporosis = Yes (%)           | 234 (13%)                      | 33 (14%)                     | 0.6         |
| Sleep Apnea = Yes (%)            | 414 (23%)                      | 46 (19%)                     | 0.3         |
| Sleep disorder = Yes (%)         | 377 (21%)                      | 43 (19%)                     | 0.5         |
| none = Yes (%)                   | 555 (30%)                      | 75 (33%)                     | 0.5         |

Supplemental Table 13 – Difference in outcome based on missing income data

|                                               | Complete Income<br>n= 2057 | Missing Income<br>n= 261 | p                |
|-----------------------------------------------|----------------------------|--------------------------|------------------|
| <b>New Sarcoidosis Comorbidity (Yes%)</b>     | <b>979 (53%)</b>           | <b>105 (46%)</b>         | <b>0.04</b>      |
| New Steroid Comorbidity (Yes%)                | 1002 (55%)                 | 121 (53%)                | 0.7              |
| Ever Hospitalized                             | 747 (38%)                  | 84 (35%)                 | 0.4              |
| <b>SHQ (mean (SD))</b>                        | <b>3.6 (1.1)</b>           | <b>4.0 (1.2)</b>         | <b>&lt;0.001</b> |
| <b>Lost Job (%)</b>                           |                            |                          | <b>&lt;0.001</b> |
| No                                            | 1092 (56%)                 | 135 (59%)                |                  |
| Not applicable - did not work                 | 220 (11%)                  | 45 (20%)                 |                  |
| Yes                                           | 628 (32%)                  | 50 (22%)                 |                  |
| <b>Affect Finances (%) = No/Slight Effect</b> | <b>1059 (53%)</b>          | <b>144 (63%)</b>         | <b>0.005</b>     |
| Oxygen Device (%) = using Oxygen              | 419 (21%)                  | 57 (23%)                 | 0.6              |
| Mobility Device= Yes (%)                      | 348 (17%)                  | 35 (14%)                 | 0.2              |

Figure E1 – Comorbidity Frequency

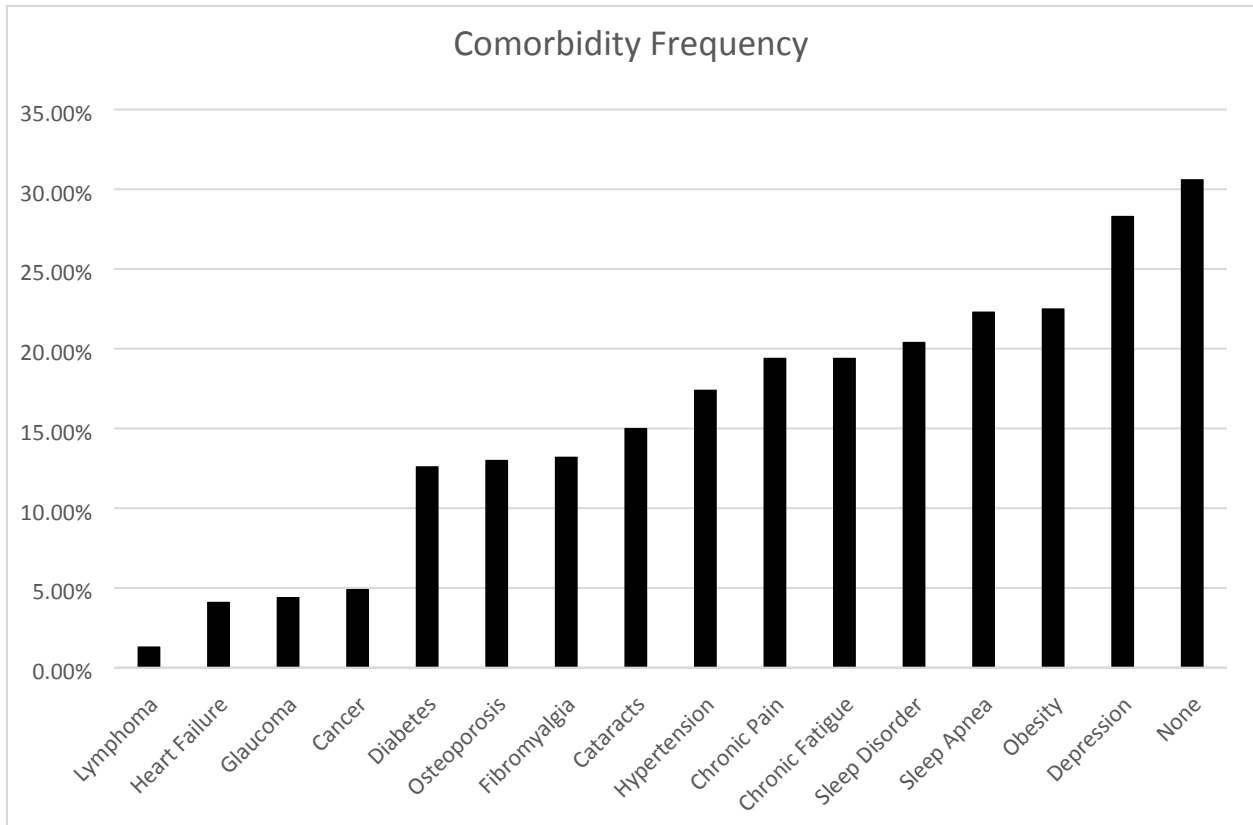

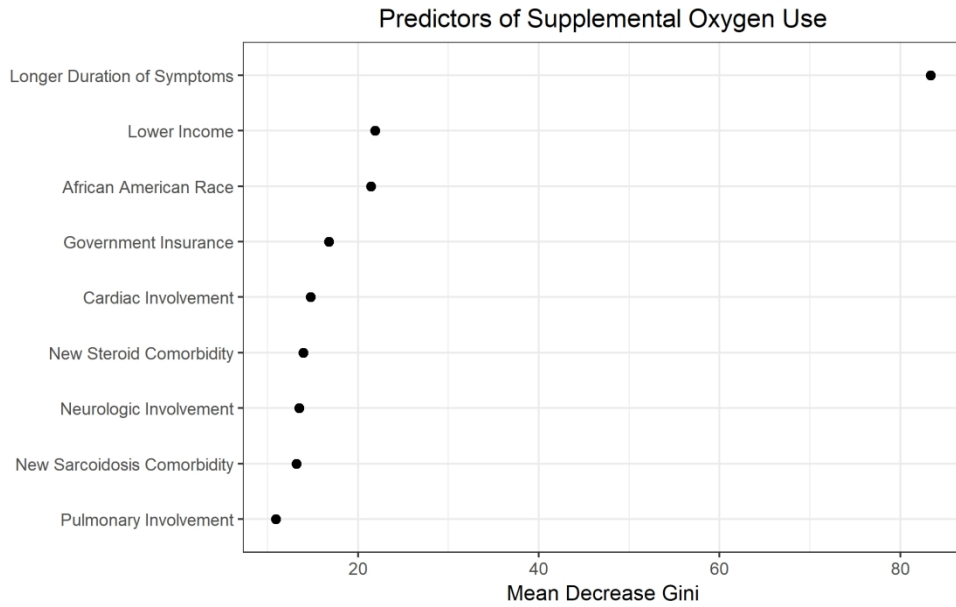

Figure E2: Random Forest Model –Supplemental Oxygen Use  
 Random Forest plots of analysis of variables included in multivariate model selected by LASSO for prediction of patient using supplemental oxygen. Higher values of “Mean Decrease Gini” reflect increasing proportional importance of the individual variables to predicting this categorical outcome.

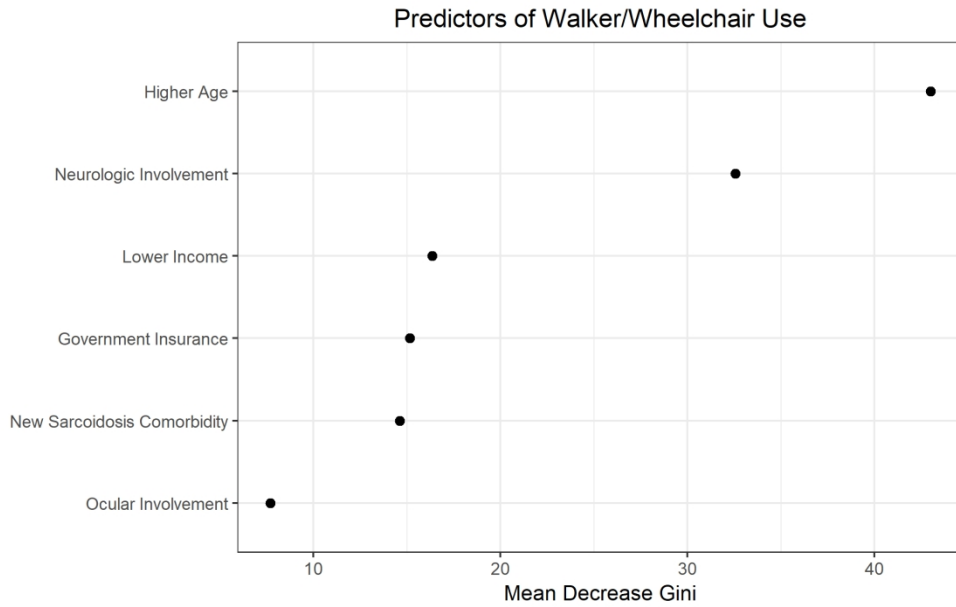

Figure E3: Random Forest Model –Walker or Wheelchair Use  
Random Forest plots of analysis of variables included in multivariate model selected by LASSO for prediction of patient using a walker or wheelchair. Higher values of “Mean Decrease Gini” reflect increasing proportional importance of the individual variables to predicting this categorical outcome.



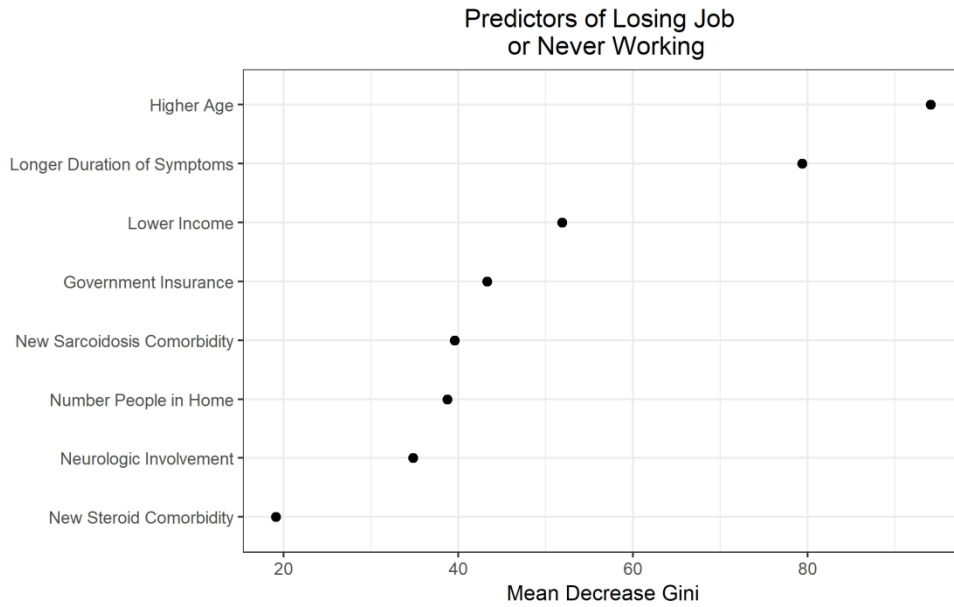

Figure E4: Random Forest Model –Lose Job or Never Worked  
 Random Forest plots of analysis of variables included in multivariate model selected by LASSO for prediction of patient never having worked or losing their job after diagnosis of sarcoidosis. Higher values of "Mean Decrease Gini" reflect increasing proportional importance of the individual variables to predicting this categorical outcome.
